# Supplementary material for: Metastable states associated with a change in the metal–metal bonding network of (MoV)6polyoxoanions: a DFT study of [(Mo2VO4)3(μ6-CO3)(μ-CO3)3(μ-OH)3]5−
Source: Royal Society of Chemistry journal article supplement (doi:10.1039/b304119k), 2003-01-01
Supplement: b304119k.pdf [file b304119k.pdf]

**Metastable states associated with a change in the metal-metal bonding network of  $(\text{Mo}^{\text{V}})_6$  polyoxoanions: a DFT study of  $[(\text{Mo}_2^{\text{V}}\text{O}_4)_3(\mu_6\text{-CO}_3)(\mu\text{-CO}_3)_3(\mu\text{-OH})_3]^{5-}$ .**

**Marie-Madeleine Rohmer and Marc Bénard**

**SUPPORTING INFORMATION**

*Laboratoire de Chimie Quantique, UMR 7551, CNRS and Université Louis Pasteur, 4 rue Blaise Pascal, F-67000 Strasbourg, France.  
E-mail : benard@quantix.u-strasbg.fr*

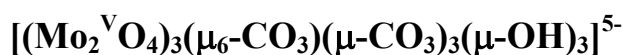

**Bond energies and Cartesian coordinates of the four energy minima.**

1. Global minimum: E = -291.67485eV

|    |         |         |         |
|----|---------|---------|---------|
| Mo | 2.5857  | 0.9253  | -1.8540 |
| Mo | -2.8955 | 0.9269  | -1.3143 |
| Mo | 0.3123  | 0.9295  | 3.1670  |
| Mo | 0.3123  | 0.9295  | -3.1670 |
| Mo | -2.8955 | 0.9269  | 1.3143  |
| Mo | 2.5857  | 0.9253  | 1.8540  |
| C  | 0.0036  | 0.0926  | 0.0     |
| O  | 1.3080  | 0.0803  | 0.0     |
| O  | -0.6496 | 0.0918  | -1.1305 |
| O  | -0.6496 | 0.0918  | 1.1305  |
| C  | 4.4713  | -0.8694 | 0.0     |
| C  | -2.2341 | -0.8682 | -3.8744 |
| C  | -2.2341 | -0.8682 | 3.8744  |
| O  | 3.8732  | -0.5722 | -1.1450 |
| O  | -2.9233 | -0.5742 | -2.7808 |
| O  | -0.9441 | -0.5700 | 3.9290  |
| O  | 5.5718  | -1.5013 | 0.0     |
| O  | -2.7874 | -1.4972 | -4.8263 |
| O  | -2.7874 | -1.4972 | 4.8263  |
| O  | 3.8732  | -0.5722 | 1.1450  |
| O  | -0.9441 | -0.5700 | -3.9290 |
| O  | -2.9233 | -0.5742 | 2.7808  |
| O  | 1.0690  | 2.1972  | -1.8555 |
| O  | -2.1412 | 2.1979  | 0.0     |
| O  | 1.0690  | 2.1972  | 1.8555  |
| O  | 1.6468  | -0.4903 | -2.8551 |
| O  | -3.2847 | -0.4910 | 0.0     |
| O  | 1.6468  | -0.4903 | 2.8551  |
| O  | 3.0750  | 1.9690  | 0.0     |
| O  | -1.5402 | 1.9867  | -2.6667 |
| O  | -1.5402 | 1.9867  | 2.6667  |
| O  | 3.7554  | 1.6626  | -2.9265 |
| O  | -4.4133 | 1.6545  | -1.7902 |
| O  | 0.6524  | 1.6672  | 4.7170  |
| O  | 0.6524  | 1.6672  | -4.7170 |
| O  | -4.4133 | 1.6545  | 1.7902  |
| O  | 3.7554  | 1.6626  | 2.9265  |
| H  | 2.3215  | 2.5950  | 0.0     |
| H  | -1.1575 | 2.6021  | -2.0028 |
| H  | -1.1575 | 2.6021  | 2.0028  |

2. Local minimum, standard isomer: E = -289.55539eV

|    |         |         |         |
|----|---------|---------|---------|
| Mo | 2.7602  | 1.0157  | -1.6470 |
| Mo | -2.8087 | 1.0163  | -1.5667 |
| Mo | 0.0473  | 1.0149  | 3.2139  |
| Mo | 0.0473  | 1.0149  | -3.2139 |
| Mo | -2.8087 | 1.0163  | 1.5667  |
| Mo | 2.7602  | 1.0157  | 1.6470  |
| C  | -0.0006 | 0.1544  | 0.0     |
| O  | 1.3027  | 0.1387  | 0.0     |
| O  | -0.6523 | 0.1390  | -1.1286 |
| O  | -0.6523 | 0.1390  | 1.1286  |
| C  | 4.2821  | -1.2203 | 0.0     |
| C  | -2.1420 | -1.2183 | -3.7090 |
| C  | -2.1420 | -1.2183 | 3.7090  |
| O  | 3.8054  | -0.7362 | -1.1398 |
| O  | -2.8900 | -0.7349 | -2.7251 |
| O  | -0.9160 | -0.7357 | 3.8653  |
| O  | 5.1569  | -2.1308 | 0.0     |
| O  | -2.5807 | -2.1272 | -4.4677 |
| O  | -2.5807 | -2.1272 | 4.4677  |
| O  | 3.8054  | -0.7362 | 1.1398  |
| O  | -0.9160 | -0.7357 | -3.8653 |
| O  | -2.8900 | -0.7349 | 2.7251  |
| O  | 1.1605  | 2.1606  | -2.0099 |
| O  | -2.3228 | 2.1611  | 0.0     |
| O  | 1.1605  | 2.1606  | 2.0099  |
| O  | 1.7101  | -0.0177 | -2.9606 |
| O  | -3.4204 | -0.0166 | 0.0     |
| O  | 1.7101  | -0.0177 | 2.9606  |
| O  | 2.7876  | 2.3347  | 0.0     |
| O  | -1.3950 | 2.3334  | -2.4153 |
| O  | -1.3950 | 2.3334  | 2.4153  |
| O  | 4.1086  | 1.7627  | -2.4791 |
| O  | -4.2028 | 1.7643  | -2.3188 |
| O  | 0.0935  | 1.7622  | 4.7977  |
| O  | 0.0935  | 1.7622  | -4.7977 |
| O  | -4.2028 | 1.7643  | 2.3188  |
| O  | 4.1086  | 1.7627  | 2.4791  |
| H  | -0.9419 | 2.7195  | -1.6292 |
| H  | 1.8797  | 2.7200  | 0.0     |
| H  | -0.9419 | 2.7195  | 1.6292  |

3. Isomer resulting from a concerted transfer of the six protons

Local minimum, E = -289.61178eV

|    |         |         |         |
|----|---------|---------|---------|
| Mo | 2.6440  | 0.9399  | -1.7613 |
| Mo | -2.8460 | 0.9427  | -1.4098 |
| Mo | 0.2029  | 0.9394  | 3.1717  |
| Mo | 0.2029  | 0.9394  | -3.1717 |
| Mo | -2.8460 | 0.9427  | 1.4098  |
| Mo | 2.6440  | 0.9399  | 1.7613  |
| C  | 0.0     | 0.0776  | 0.0     |
| O  | 1.2929  | 0.1056  | 0.0     |
| O  | -0.6464 | 0.1118  | -1.1194 |
| O  | -0.6464 | 0.1118  | 1.1194  |
| O  | 4.4472  | -0.9195 | 0.0     |
| O  | -2.2204 | -0.9281 | -3.8450 |
| O  | -2.2204 | -0.9281 | 3.8450  |
| O  | 3.8276  | -0.6687 | -1.1505 |
| O  | -2.9092 | -0.6688 | -2.7365 |
| O  | -0.9151 | -0.6724 | 3.8879  |
| O  | 5.5708  | -1.4983 | 0.0     |
| O  | -2.7799 | -1.5197 | -4.8115 |
| O  | -2.7799 | -1.5197 | 4.8115  |
| O  | 3.8276  | -0.6687 | 1.1505  |
| O  | -0.9151 | -0.6724 | -3.8879 |
| O  | -2.9092 | -0.6688 | 2.7365  |
| O  | 1.1075  | 2.4181  | -1.9212 |
| O  | -2.2122 | 2.4177  | 0.0     |
| O  | 1.1075  | 2.4181  | 1.9212  |
| O  | 1.6111  | -0.4199 | -2.7914 |
| O  | -3.2247 | -0.4159 | 0.0     |
| O  | 1.6111  | -0.4199 | 2.7914  |
| O  | 3.1198  | 1.7329  | 0.0     |
| O  | -1.5611 | 1.7327  | -2.7070 |
| O  | -1.5611 | 1.7327  | 2.7070  |
| O  | 3.7593  | 1.6809  | -2.8857 |
| O  | -4.3748 | 1.6886  | -1.8138 |
| O  | 0.6199  | 1.6819  | 4.6988  |
| O  | 0.6199  | 1.6819  | -4.6988 |
| O  | -4.3748 | 1.6886  | 1.8138  |
| O  | 3.7593  | 1.6809  | 2.8857  |
| H  | 0.6281  | 2.6195  | -1.0936 |
| H  | -1.2572 | 2.6264  | 0.0     |
| H  | 0.6281  | 2.6195  | 1.0936  |

4. Isomer resulting from a concerted transfer of the six protons

Local minimum,  $E = -290.24305\text{eV}$

|    |         |         |         |
|----|---------|---------|---------|
| Mo | 2.7921  | 1.0176  | -1.5033 |
| Mo | -2.6980 | 1.0196  | -1.6650 |
| Mo | -0.0956 | 1.0237  | 3.1669  |
| Mo | -0.0956 | 1.0237  | -3.1669 |
| Mo | -2.6980 | 1.0196  | 1.6650  |
| Mo | 2.7921  | 1.0176  | 1.5033  |
| C  | -0.0015 | -0.0229 | 0.0     |
| O  | 1.2976  | -0.0274 | 0.0     |
| O  | -0.6509 | -0.0308 | -1.1251 |
| O  | -0.6509 | -0.0308 | 1.1251  |
| C  | 4.3160  | -1.2410 | 0.0     |
| C  | -2.1578 | -1.2321 | -3.7468 |
| C  | -2.1578 | -1.2321 | 3.7468  |
| O  | 3.8414  | -0.7567 | -1.1419 |
| O  | -2.9083 | -0.7528 | -2.7626 |
| O  | -0.9326 | -0.7433 | 3.9092  |
| O  | 5.1841  | -2.1556 | 0.0     |
| O  | -2.5900 | -2.1456 | -4.5010 |
| O  | -2.5900 | -2.1456 | 4.5010  |
| O  | 3.8414  | -0.7567 | 1.1419  |
| O  | -0.9326 | -0.7433 | -3.9092 |
| O  | -2.9083 | -0.7528 | 2.7626  |
| O  | 1.2770  | 2.3782  | -2.2005 |
| O  | -2.5656 | 2.3837  | 0.0     |
| O  | 1.2770  | 2.3782  | 2.2005  |
| O  | 1.6371  | 0.0956  | -2.8417 |
| O  | -3.2756 | 0.0920  | 0.0     |
| O  | 1.6371  | 0.0956  | 2.8417  |
| O  | 2.5197  | 2.2545  | 0.0     |
| O  | -1.2547 | 2.2565  | -2.1663 |
| O  | -1.2547 | 2.2565  | 2.1663  |
| O  | 4.1824  | 1.7410  | -2.2862 |
| O  | -4.0734 | 1.7347  | -2.4814 |
| O  | -0.1134 | 1.7668  | 4.7532  |
| O  | -0.1134 | 1.7668  | -4.7532 |
| O  | -4.0734 | 1.7347  | 2.4814  |
| O  | 4.1824  | 1.7410  | 2.2862  |
| H  | 0.8459  | 2.8203  | -1.4421 |
| H  | -1.6959 | 2.8312  | 0.0     |
| H  | 0.8459  | 2.8203  | 1.4421  |
